# Developmental patterning of the sub-epidermal integument cell layer in *Arabidopsis* seeds

Olivier Coen<sup>1,2,°</sup>, Elisa Fiume<sup>1,°</sup>, Wenjia Xu<sup>1,°</sup>, Delphine De Vos<sup>1</sup>, Jing Lu<sup>1,2</sup>, Christine Pechoux<sup>3</sup>, Loïc Lepiniec<sup>1</sup>, Enrico Magnani<sup>1\*</sup>

<sup>1</sup>Institut Jean-Pierre Bourgin, INRA, AgroParisTech, CNRS, University of Paris-Saclay, Route de St-Cyr (RD10), 78026 Versailles Cedex, France

<sup>2</sup>Ecole Doctorale 567 Sciences du Végétal, University Paris-Sud, University of Paris-Saclay, bat 360, 91405 Orsay Cedex, France

<sup>3</sup>INRA, Génétique Animale et Biologie Intégrative, Domaine de Vilvert, 78352, Jouy-en-Josas Cedex, France

<sup>°</sup>First coauthors

\*Lead contact and corresponding author: [enrico.magnani@inra.fr](mailto:enrico.magnani@inra.fr)

## KEYWORDS

Fertilization, seed coat, integuments, tissue cross-talk, seed development

## SUMMARY STATEMENT

In early *Arabidopsis* seed development, the endosperm was thought to drive the growth of all seed coat integument cell layers. Here, we show that the sub-epidermal integument cell layer displays a unique response to fertilization.

## ABSTRACT

Angiosperm seed development is a paradigm of tissue cross-talking. Proper seed formation requires spatial and temporal coordination of the fertilization products, embryo and endosperm, and the surrounding seed coat maternal tissue. In early *Arabidopsis* seed development, all seed integuments were thought to respond homogenously to endosperm growth. Here, we show that the sub-epidermal integument cell layer has a unique developmental program. We characterized the cell patterning of the sub-epidermal integument cell layer, which initiates an extra cell layer previously uncharacterized, and identified TRANSPARENT TESTA 16 and SEEDSTICK MADS box transcription factors as master regulators of its polar development and cell architecture. Our data indicate that the differentiation of the sub-epidermal integument cell layer is insensitive to endosperm growth alone and to the repressive mechanism established by FERTILIZATION INDEPENDENT ENDOSPERM and MULTICOPY SUPPRESSOR OF IRA1 Polycomb group proteins. This work demonstrates the different response of epidermal and sub-epidermal integument cell layers to fertilization.

## INTRODUCTION

In angiosperm plants, seed development starts with the double fertilization of the egg and central cell in the ovule that leads to the formation of embryo and endosperm, respectively. Proper seed formation is then achieved through tight spatial and temporal coordination of embryo, endosperm, and seed maternal tissues (Ingram, 2010).

In *Arabidopsis*, ovule primordia are composed of three functional domains: the funiculus, which transports nutrients from the mother plant, the chalaza, which initiates two integuments, and the nucellus, which originates the female gametophyte. Both inner (ii) and outer (oi) integuments are composed of two epidermal cell layers (ii1, ii2, oi1, and oi2) which grow by anticlinal cell divisions to progressively surround the female gametophyte. At the end of ovule development, the ii1 undergoes periclinal cell divisions to give rise to a sub-epidermal integument cell layer, the so-called ii1' (Fig. S1) (Schneitz et al., 1995; Debeaujon et al., 2003). The fertilization-independent development of the ovule is repressed by a class of Polycomb Group (PcG) proteins, named FERTILIZATION INDEPENDENT SEED (FIS). In particular, the FERTILIZATION INDEPENDENT ENDOSPERM (FIE) and MULTICOPY SUPPRESSOR OF IRA1 (MSI1) FIS PcG proteins act sporophytically to repress the differentiation of the integuments (Roszak and Kohler, 2011). After fertilization of the central cell, the endosperm initiates a signal, through the action of the MADS box transcription factor AGAMOUS-LIKE 62, that relieves the FIS mediated repression and leads to the differentiation of the ovule integuments into seed coat (Roszak and Kohler, 2011). Results by Figueiredo et al. indicate that auxin is the putative fertilization signal that coordinates endosperm and seed coat development (Figueiredo et al., 2016). Nevertheless, exclusive fertilization of the egg cell by *kokopelli* or *cyclin dependent kinase A;1* mutant pollen triggers partial differentiation of the ovule integuments surrounding the female gametophyte (Ungru et al., 2008; Kasahara et al., 2016). Partial differentiation of the ovule integuments is also initiated by the pollen tube content of the *generative cell-specific 1* (*gcs1*) mutant, whose sperm cells fail to fertilize the female gametophyte (Kasahara et al., 2016). Furthermore, *gcs1* pollen tube content induces full differentiation of the integuments of *medea FIS* PcG mutant ovules, which undergo fertilization-independent proliferation of the central cell. These data suggest that pollen tube rupture and not fertilization enables the central cell to initiate the signaling pathway that leads to the differentiation of the seed coat. In response to the endosperm signal, the five seed coat cell layers undergo a rapid phase of cell division and expansion, and follow different cell fates (Haughn and Chaudhury, 2005). The MADS box protein, TRANSPARENT TESTA 16 (TT16), works downstream of FIE and MSI1 to

promote the production of proanthocyanidins (PAs) in the ii1, the innermost seed coat cell layer (also known as endothelium) (Xu et al., 2016). Finally, endosperm and seed coat coordinate their growth through a cross-talk signaling pathway (Ingram, 2010) that was first identified in the study of the maternally acting *TRANSPARENT TESTA GLABRA 2* (*TTG2*) and zygotically acting *HAIKU* (*IKU*) genes. Both *ttg2* and *iku* mutants show premature arrest of endosperm development and reduced seed size indicating that the developmental interaction between seed coat and endosperm orchestrates early seed growth with limited embryo contribution (Garcia et al., 2005).

To date, all seed integuments were thought to respond to the same signaling pathway initiated by endosperm growth. Here, we show that the sub-epidermal ii1' has a unique developmental program. We followed ii1' cell patterning from its inception in the ovule till its differentiation in the seed. We demonstrated that the ovule ii1' undergoes periclinal cell divisions to originate a sixth integument cell layer, previously unnoted. We characterized the redundant role of the MADS box transcription factors TT16 and SEEDSTICK in promoting ii1' formation in the ovule. Furthermore, we showed that TT16 regulates the proximal-distal patterning of the ii1' preventing its development in the micropylar zone. After fertilization, TT16 is implicated in cell orientation and differentiation of the ii1'. Our analyses indicate that ii1' growth does not respond to the FIE and MSI1 PcG repressive mechanism and to endosperm growth alone, which regulate the development of the epidermal integument cell layers. These data indicate that epidermal and non-epidermal integument cell layers respond to different fertilization signalling pathways.

## RESULTS

### The ii1' gives rise to a sixth integument cell layer

The last stage of *Arabidopsis* ovule development, stage 3-VI, is marked by the formation of the inner integument 1' (ii1') by periclinal cell divisions of the ii1, the innermost integument cell layer (Fig. S1) (Schneitz et al., 1995; Debeaujon et al., 2003). To thoroughly characterize the process of ii1' formation we analyzed central longitudinal sections of *Arabidopsis* ovules at stage 3-VI, three dimensionally reconstructed using the modified pseudo-Schiff propidium iodide imaging technique (mPS-PI, see Materials and methods). Cells of the ii1 underwent periclinal cell divisions starting from the chalazal pole and progressed toward the micropyle region without interruptions (Fig. 1A-C, ii1 and ii1' are highlighted in yellow and red, respectively, throughout this manuscript). The first cell of the ii1, identified as the cell following the merging of the ii1 and ii2 in the chalazal pigment

strand (Fig. S1), did not undergo periclinal cell divisions (Fig. 1A-C). The *ii1'* arose from the second, third or fourth cell of the *ii1* and developed toward the micropyle without ever reaching it (Fig. 1A-C). At the end of stage 3-VI/beginning of stage 4-I, we observed additional periclinal cell division in the *ii1'* that gave rise to a sixth integument cell layer, which we named *ii1''* (Fig. 2B, the *ii1''* is highlighted in green throughout this manuscript). The *ii1''* was limited to the chalazal area, as fertilization followed rapidly and led to the differentiation of the integuments, but persisted after fertilization showing a developmental patterning similar to the *ii1'* (Fig. 2C). The *ii1''* phenotype was more penetrant in the Wassilewskija accession (70 % of the ovules) compared to Columbia (35% of the ovules). Both *ii1'* and *ii1''* are sub-epidermal cell layers, compared to the other integument cell layers which are all L1 epidermal layers (Fig. 2B,C) (Debeaujon et al., 2003).

### **TT16 and STK regulate *ii1'* cellular patterning**

The ovules of the *Arabidopsis transparent testa 16;seedstick* (*tt16;stk*) double mutant have been shown to carry only four integument cell layers and interpreted as missing the *ii1* (Mizzotti et al., 2012). The progression of wild type integuments development argues against such interpretation as the *ii1'* is the last integument cell layer to appear (Schneitz et al., 1995). We therefore analyzed the development of the *tt16;stk* innermost integument cell layer by mPS-PI in ovules and seeds. We detected few periclinal cell divisions happening stochastically along the integument proximal-distal axis (Fig. 1F,G and S2) when compared to wild type (Fig. 1D and S2). In 89% of the *tt16;stk* samples we observed a patchy pattern of periclinal cell divisions (Fig. 1G and S2), a phenotype never observed in wild type (Fig. 1D and S2). These data strongly suggest that *tt16;stk* ovules are impaired in the periclinal cell divisions of the innermost integument cell layer that, in wild type ovules, give rise to the *ii1'*. 9,5% of *tt16;stk* seeds displayed a few *ii1''* cells. Although the *stk* single mutant exhibited a pronounced ovule shape defect (Mizzotti et al., 2014), it did not show any *ii1'* or *ii1''* aberrant phenotype (Fig. 1E and S2). On the other hand, 74% of *tt16* ovules displayed a more distal *ii1'* and *ii1''* (after the fourth *ii1* chalazal cell) compared to wild type (Fig. 2D). 16% of *tt16* ovules developed a long *ii1''* that resulted in a true six-cell layered seed coat (Fig. 2G). In wild type seeds, the *ii1'* extended through the curving zone until approximately halfway towards the micropylar pole (Fig. 2C,I). As a consequence, transverse imaging of wild type seeds beyond their midline did not show the *ii1'* around the developing embryo (Fig. 3D). Inversely, in the majority of *tt16* seeds, the *ii1'* was still present beyond the seed midline and entered the micropylar region (Fig. 2F-I). Transverse views of *tt16* seeds beyond their midline

strikingly showed a shift of the ii1' toward the side occupied by the developing embryo (Fig. 3E). Thus, *tt16* developing embryos were often compressed by the concomitant mechanical action of the seed ii1' invading the micropylar pole (Fig. 2H) and the persistence of the nucellus at the chalazal pole (Xu et al., 2016). Embryo cell morphology and proliferation in the *tt16* mutant appeared un-perturbed and comparable to wild-type (Fig. 2C-H). The maternal origin of the compressed embryo phenotype was confirmed by analyzing *tt16* ovules fertilized with wild type pollen (Fig. S3). This phenomenon could be partially responsible for the arrested seed phenotype that we observed in *tt16* mutant siliques. Six week-old *tt16* plants carried between 7 and 23% (Ws background) or 6 and 33% (Col background) arrested seeds per silique (n of siliques observed= 20), whereas control wild type plants exhibited a low rate (1.4 to 3.2% in Ws or 0 to 12% in Col) of seed arrest in the same growing conditions (n of siliques observed= 13 in Ws and n= 20 in Col). Embryo arrest in *tt16* seeds might also be caused by defects in nutrient transport through the seed coat (Chen et al., 2015). Altogether, these data indicate that STK and TT16 redundantly promote ovule ii1' formation whereas TT16 alone regulates the positioning of the ii1' along the ii1 proximal-distal axis.

To test if *TT16* expression correlates with the development of the ovule ii1', we created a marker line carrying *TT16* 3.4 Kb promoter region and genomic sequences translationally fused to the green fluorescent protein (GFP). We have previously shown that this *TT16* genomic region fully complements the *tt16* mutant phenotypes in the nucellus and endothelium (Xu et al., 2016). We detected fluorescence in the nuclei of the proximal region of the ovule ii1 at stage 3-V (Fig. 3A) and in the developing ii1' (Fig. 3B) at stage 3-VI. *GFP* expression extended to more distal cells of the endothelium and ii1' in seeds at 2 days after flowering (DAF, see materials and methods) but never reached the micropyle (Fig 3C). *TT16* expression pattern in the ovule ii1 marks in advance the development of the ii1' and might be therefore responsible for the correct positioning and progressing of the ii1 periclinal cell divisions. In one possible scenario, *TT16* might define only the position of the first ii1' cell, whereas the following periclinal cell divisions continue by default till ovule maturity. Alternatively, *TT16* might define the precise ii1' spatial window from beginning to end. To distinguish between these two hypotheses, we expressed *TT16* under the control of the 1.6 Kb *TT16* promoter, which marks the first two or three proximal cells of the ovule ii1 and the nucellus, in a *tt16* mutant background (*1.6ProTT16:gTT16;tt16*) (Xu et al., 2016). Three independent transgenic lines fully complemented the *tt16* phenotype at the ii1' chalazal end (Fig. 2I and S4). Nevertheless, they failed to complement the growth of the ii1' into the micropylar area and produced seeds that were completely covered by five seed coat cell layers

(Fig. 2I and S4). These data might highlight the limited extent of TT16 non-cell autonomous effect (Xu et al., 2016) along the ii1 proximal-distal axis. Nevertheless, these same complementation lines fully restored the arrested production of proanthocyanidins (PAs) along the entire *tt16* endothelium (Xu et al., 2016). Therefore, our analyses strongly suggest that *TT16* marks the end of the ii1 periclinal cell divisions in a cell autonomous fashion in contrast to the non-cell autonomous regulation of PA biosynthesis. In line with this hypothesis, early expression of *TT16* in the ii1, with the exception of the micropylar zone, under the control of the *TT1* promoter region (Fig. S4) fully complemented the *tt16* ii1' phenotype at the chalazal and micropylar regions (*ProTT1:gTT16;tt16*, Fig. 2I and S4). Embryos of *1.6ProTT16:gTT16;tt16* seeds, which displayed a wild type looking nucellus (Xu et al., 2016) and a five cell layered seed coat at the micropylar zone, were never compressed by the surrounding seed coat (Fig. S4) as observed in *tt16* seeds (Fig. 2H and S3). We could not analyze seeds carrying a wild type looking seed coat and persistent nucellus as the nucellus of *ProTT1:gTT16;tt16* seeds degenerates due to TT16 non-cell autonomous effect (Xu et al., 2016). The negative effect of ii1' growth around the embryo combined with nucellus persistence might have driven the evolution of a tight regulatory mechanism that coordinates ii1' and nucellus development.

*STK* promoter region and genomic sequences drove *GFP* expression in the ovule outer integument (oi) and ii2 since integument formation in ovule primordia (Fig. 1H,I) (Mizzotti et al., 2014). The absence of *STK* expression in the ii1 suggests that *STK* affects ii1 periclinal cell divisions non-cell autonomously.

### **TT16 regulates ii1' cell architecture**

In line with previous analyses (Nesi et al., 2002), longitudinal sections of *tt16* seeds showed thinner and more elongated cells in the endothelium and ii1' when compared to wild type (Fig. 2F-H). To better characterize such morphological problems, we analyzed images of three-dimensionally reconstructed seeds using the mPS-PI technique. In the proximal half of the wild type seed coat, endothelium and ii1' cells tended to be tubular in shape and oriented perpendicularly to the longitudinal axis of the seed (Figure 3F). Thus, they appeared round in longitudinal sections (Fig. 2C) and elongated in transverse sections (Fig. 3D). In the *tt16* mutant, endothelium and ii1' cells appeared equally tubular but aligned along the proximal-distal axis of the seed, thus perpendicular to wild type cells (Fig. 3G). We noticed that the orientation of these cells changed along the proximal-distal axis in both wild type and *tt16* seeds. Longitudinal sections of the wild type ii1' displayed cells more elongated in the



chalazal and micropylar zones compared to the curving zone (Fig. 3H and S5). The *tt16* ii1' followed the same trend of cell elongation along the proximal-distal axis but showed cells strikingly more elongated than in the wild type (Fig. 3H). These analyses clearly suggest that TT16 regulates endothelium and ii1' cell architecture, probably responsible for the misshaped *tt16* seed phenotype (Nesi et al., 2002). TT16 might establish ii1 and ii1' cell orientation in the ovule but its mutant phenotype became evident in seeds after cell elongation. Such a phenotype accentuates the proximal-distal positional defect of the *tt16* ovule ii1' described above.

The ii1' undergoes a drastic cell expansion in response to fertilization (Fig. 2C and 3D) (Beeckman et al., 2000). Transmission electron microscopy imaging revealed highly vacuolated ii1' cells (Fig. 3I) at the curving zone of wild type seeds. In *tt16* seeds, these cells appeared more cytoplasmic suggesting that their cell expansion might be impaired (Fig. 3J). Similarly, *tt16* seeds fail to correctly differentiate the endothelium as they do not produce PAs (Nesi et al., 2002). Altogether, these data indicate that TT16 regulates cell orientation and differentiation of the endothelium and seed ii1'.

### ii1' unique response to fertilization

Fertilization of the central cell has been shown to trigger the differentiation of seed maternal tissues (Roszak and Kohler, 2011; Xu et al., 2016). To test the effect on ii1' differentiation of each fertilization event independently, we examined the seed coat of the *kokopelli* (*kpl*) mutant, which displays random single-fertilization events (Ron et al., 2010). *kpl* seeds carrying only the embryo (*kpl* only-embryo seeds) have a small and partially differentiated seed coat (Roszak and Kohler, 2011; Kasahara et al., 2016). By contrast, *kpl* seeds that develop only the endosperm (*kpl* only-endosperm seeds) produce a large seed coat with a fully differentiated endothelium, as suggested by PAs accumulation (Roszak and Kohler, 2011). In line with previous results, the ii1' of *kpl* only-embryo seeds resembled that of undifferentiated ovules (Fig. 4C compared to Fig. S6). In *kpl* only-endosperm seeds, the ii1' cells did not expand in coordination with the development of the other integument cell layers creating empty spaces (Fig. 4B compared to Fig. 4A). The development of the ii1' was not affected in *kpl* mutant ovules (Fig. S6). These data suggest that ii1' differentiation requires the fertilization of both the egg and central cell.

The *FERTILIZATION INDEPENDENT ENDOSPERM* (*FIE*) and *MULTICOPY SUPPRESSOR OF IRA1* (*MSII*) Polycomb (PcG) genes are expressed in all ovule integument cell layers (Kohler et al., 2003; Xu et al., 2016) and are thought to repress their fertilization-



independent development (Roszak and Kohler, 2011). *fie* and *msil* mutations are haploinsufficient and unfertilized *fie/+* and *msil/+* pistils carry a number of enlarged autonomous seeds. These seeds exhibit an apparently developed seed coat that accumulates PAs and a degenerated nucellus, both hallmarks of fertilization (Roszak and Kohler, 2011; Xu et al., 2016). However, we observed that *fie/+* and *msil/+* enlarged autonomous seeds displayed an underdeveloped and discontinuous ii1' made of unexpanded cells and large empty spaces (Fig. 4E,F compared to Fig. 4D and Fig. 4M). Furthermore, we found a higher number of ii1' cells in *fie/+* and *msil/+* enlarged autonomous seeds compared to wild type seeds and ovules (Fig. S6). By contrast, ii1' development was unaffected in *fie/+* and *msil/+* developing ovules and seeds (Fig. S6). We speculate that the differentiation of the ovule ii1' is not solely repressed by FIE and MSI1 and might require the action of other FIS PcG proteins or a different molecular mechanism. Alternatively, it might lack any repressive mechanism and respond to the positive stimulus of double fertilization. Altogether, these results demonstrate that epidermal and non-epidermal integument cell layers are regulated by different fertilization signaling pathways.

To test if TT16 plays a role in the process, we looked at *tt16;fie/+* and *tt16;msil/+* enlarged autonomous seeds. We focused our attention on the fraction of seeds that did not display a strong *tt16* proximal-distal polarity defect in the ii1' to better compare the results to single PcG mutants. The ii1' of both double mutants resembled that of *tt16* fertilized seeds but with less expanded cells (Fig. 4H,I compared to Fig. 4G). Since *tt16* ii1' cells are oriented perpendicularly to wild type cell, we analyzed transverse sections of *tt16;fie/+* and *tt16;msil/+* enlarged autonomous seeds. We observed that the ii1' did not expand correctly and showed large empty spaces when compared to *tt16* fertilized seeds (Fig. 4K,L compared to Fig. 4J), a phenotype similar to the one observed in *fie/+* and *msil/+* seed longitudinal sections (Fig. 4E,F). These results suggest that TT16 does not affect ii1' responsiveness to the fertilization signals and to the growth of the neighboring integument cell layers.

*fie/+* and *msil/+* enlarged autonomous seeds showed cells of the ii1' physically disconnected from one another and from the ii2 (Fig. 4N). We tested if this is also the case in wild type seeds by gently squeezing them in between slide and coverslip. In all our attempts (n= 20), the ii1' was easily detached from the ii2 whereas it remained always anchored to the endothelium (Fig. 4O). The only other tissues that were occasionally separated during these experiments were the ii2 and oi1 which are separated by cutin-like material (Creff et al., 2015) that allows tissue sliding (Tsuwamoto et al., 2008). These results indicate that the seed ii1' is loosely attached to the ii2 and suggest that it might develop unique cell wall properties.

## DISCUSSION

All *Arabidopsis* seed coat cell layers were thought to respond homogeneously to the fertilization of the central cell and grow in a coordinated fashion with the endosperm. Our genetic analyses reveal the unique developmental program of the sub-epidermal integument cell layer. The underdeveloped *ii1'* of *kpl* only-endosperm seeds and *fie/+* and *msil/+* enlarged autonomous seeds contrast with the growth of the other seed coat tissues and suggest a role for the embryo in early seed coat development (Fig. 4P). Furthermore, these data indicate a lack of developmental cross-talking between epidermal and sub-epidermal integument cell layers. In one scenario, the embryo might be necessary to establish developmental coordination between the *ii1'* and the other integument cell layers. Alternatively, the *ii1'* might have evolved to grow independently of the other seed coat cell layers and arrest its development when compressed between the neighboring cell layers, solely under the constraints of mechanical forces. In line with the latter hypothesis, the seed coat of the *tt16* and *tt16;stk* mutants grows regardless of the displaced or absent *ii1'*. Furthermore, the higher number of *ii1'* cell observed in *fie/+* and *msil/+* enlarged autonomous seeds might be interpreted as a compensation for the lack of *ii1'* cell expansion driven by the absence of mechanical constraints. Compared to the epidermal integument cell layers, the *ii1'* originates by periclinal cell divisions. This process might underlie the unique properties of this tissue by leading to unequal partitioning of signaling components or a change in the epigenetic state.

The morphology of the *ii1'*, highly vacuolated and free to expand on the ab-axial side, resembles that of the leaf parenchyma and suggests a role in cushioning seed coat development (Fig. 4P). We speculate that the *ii1'* fine-tunes seed growth by offsetting perturbations in its developmental program. For example, the *ii1'* might fill the empty space left by uneven growth of the seed inner and outer integuments or adjust seed coat development to the turgor pressure exerted by the endosperm (Beauzamy et al., 2016). This function might be better achieved through mechanical constraints than tight developmental control as it would provide a level of flexibility that is highly favorable to sessile organisms which have to adapt to environmental changes.

## MATERIALS AND METHODS

### Plant and genetic materials

*Arabidopsis thaliana* plants, ecotype Columbia (Col) or Wassilewskija (Ws), were used as wild-type controls when appropriate. *kpl-1*, *tt16-2*, and *tt16-3* lines are in the Ws accession (Nesi et al., 2002; Ron et al., 2010). *stk-2*, *stk-2;tt16-6*, *fie-12/+* and *msi1-1/+*, lines are in the Col accession (Roszak and Kohler, 2011; Mizzotti et al., 2012). The *tt16-1* mutant was isolated in the Ws accession and then backcrossed to the Col accession more than three times (Nesi et al., 2002; Xu et al., 2016). Col and Ws *tt16-1* mutants were used according to the experiment. Unless noted, *tt16* refers to *tt16-1*. *tt16-1;fie-12/+* and *tt16-1;msi1-1/+* lines were generated in the Col accession (Xu et al., 2016).

Days after flowering (DAF) have been counted starting from the emergence of the pistil from closed flowers (Xu et al., 2016). Both DAF and embryo development have been used to determine seed developmental stages.

### Cloning

The *TT16* 3.4 Kb promoter and genomic sequence was PCR amplified without stop codon using the *attB1*-(5'-TCAATGGTAATTCATGAGGACGTTG-3') forward and *attB2*-(5'-ATCATTCTGGGCCGTTGGATCGTT-3') reverse primers. The PCR amplification was performed using the *attB1* (5'-GGGGACAAGTTTGTACAAAAAAGCAGGCT-3') and *attB2* (5'-GGGGACCACTTTGTACAAGAAAGCTGGGTC-3') GATEWAY recombination sites at the 5'-ends of the forward and reverse primers, respectively. The PCR product was amplified by high-fidelity Phusion DNA polymerase (Thermo Fisher Scientific Inc.), recombined into the pDONR207 vector (BP Gateway reaction) according to the manufacturer's instructions (Thermo Fisher Scientific Inc.), and sequenced. The PCR product cloned into the DONR vector was then recombined into the *pMDC107* binary vector (Curtis and Grossniklaus, 2003) (LR Gateway reaction) according to the manufacturer's instructions (Thermo Fisher Scientific Inc.). *1.6ProTT16:gTT16;tt16-1*, *ProTT1:gTT16;tt16-1*, *ProTT1:gTT16-GUS*, and *ProSTK:gSTK-GFP* lines were previously described (Mizzotti et al., 2014; Xu et al., 2016)

### Transgenic Plants

The *Agrobacterium tumefaciens* strain C58C1 was used to stably transform *Arabidopsis* plants through the floral dip method (Clough and Bent, 1998). Transformants were selected by the appropriate resistance and then checked by PCR assays. More than 20 independent transgenic lines were tested for each construct transformed.

### **Pseudo-Schiff propidium iodide staining**

This protocol allows the staining of cell walls of fixed plant material (Xu et al., 2016). More than 30 independent seeds or ovules were analyzed for each genotype and time point.

### **Microscopy**

mPS-PI and GFP fluorescent imaging was conducted with a Leica TCS-SP5 spectral confocal laser scanning microscope (Leica Microsystems). Electron microscopy analyses were conducted as in (Xu et al., 2016).

### **Quantitative morphological analyses**

The central longitudinal section of seeds at 4 DAF, imaged using the mPS-PI technique, was segmented into individual cells through the CellSeT software (Pound et al., 2012). The length of the entire endothelium tissue and individual ii1' cells along the proximal-distal axis were calculated using the Image J software (Schneider et al., 2012). Area and perimeter of the ii1' cells were calculated with the CellSeT software. Cell roundness was determined for each ii1' cell as  $R = \frac{\frac{P^2}{4\pi A} - 1}{\frac{4}{\pi} - 1}$ , where  $R$ ,  $P$  and  $A$  represent roundness, perimeter and area of the cell, respectively. Length and distance from the first proximal endothelium cell were used to determine the position of each ii1' cell along the proximal-distal axis. Since seeds display a degree of variability in their length and cell number across individuals and genotypes, we arbitrarily sampled 201 points uniformly distributed along the proximal-distal axis of each seed coat analyzed. Point 0 was fixed at the proximal side of the first proximal endothelium cell, whereas point 201 was set at the distal side of the first endothelium cell reaching the embryo suspensor. For each point, we determined the area and roundness of the ii1' cell encompassing it. We then calculated the average ii1' cell roundness and area at each specific point. Due to variability in the ii1' position along the proximal-distal axis in each genotype, the extreme proximal and distal points are represented by less cells than the points at the curving zone.

### **Accession Numbers**

FIE (AT3G20740), KPL (AT5G63720), MSI1 (AT5G58230), STK (AT4G09960), TT16 (AT5G23260),

## ACKNOWLEDGEMENTS

We thank L. Colombo for *stk* and *stk;tt16* mutants and *ProSTK:gSTK-GFP* seeds and the “Observatoire du Végétal” for plant culture and access to imaging facility and assistance.

## COMPETING INTERESTS

No competing interests declared.

## AUTHOR CONTRIBUTIONS

O.C, E.F., W.X. performed the research and helped to analyze the data and write the paper. D.D.V. and J.L. performed some of the morphological analyses. C.P. performed the transmission electron microscopy analysis, L.L. helped to analyze the data, E.M designed the research and wrote the paper.

## FUNDING

The project was supported by the Marie Curie SEEDNET EU-CIG n°321710 and Labex Saclay Plant Sciences-SPS (ANR-10-LABX-0040-SPS) grants.

## REFERENCES

- Beauzamy, L., Fourquin, C., Dubrulle, N., Boursiac, Y., Boudaoud, A., and Ingram, G. (2016). Endosperm turgor pressure decreases during early Arabidopsis seed development. *Dev Suppl* 143, 3295-3299.
- Beeckman, T., De Rycke, R., Viane, R., and Inzé, D. (2000). Histological Study of Seed Coat Development in *Arabidopsis thaliana*. *J Plant Res* 113, 139-148.
- Chen, L.Q., Lin, I.W., Qu, X.Q., Sosso, D., McFarlane, H.E., Londono, A., Samuels, A.L., and Frommer, W.B. (2015). A cascade of sequentially expressed sucrose transporters in the seed coat and endosperm provides nutrition for the Arabidopsis embryo. *Plant Cell* 27, 607-619.
- Clough, S.J., and Bent, A.F. (1998). Floral dip: a simplified method for *Agrobacterium*-mediated transformation of *Arabidopsis thaliana*. *Plant J* 16, 735-743.
- Creff, A., Brocard, L., and Ingram, G. (2015). A mechanically sensitive cell layer regulates the physical properties of the Arabidopsis seed coat. *Nat Commun* 6, 6382.
- Curtis, M.D., and Grossniklaus, U. (2003). A gateway cloning vector set for high-throughput functional analysis of genes in planta. *Plant Physiol* 133, 462-469.
- Debeaujon, I., Nesi, N., Perez, P., Devic, M., Grandjean, O., Caboche, M., and Lepiniec, L. (2003). Proanthocyanidin-accumulating cells in Arabidopsis testa: regulation of differentiation and role in seed development. *Plant Cell* 15, 2514-2531.
- Figueiredo, D.D., Batista, R.A., Roszak, P.J., Hennig, L., and Kohler, C. (2016). Auxin production in the endosperm drives seed coat development in Arabidopsis. *Elife* 5.
- Garcia, D., Fitz Gerald, J.N., and Berger, F. (2005). Maternal control of integument cell elongation and zygotic control of endosperm growth are coordinated to determine seed size in Arabidopsis. *Plant Cell* 17, 52-60.
- Haughn, G., and Chaudhury, A. (2005). Genetic analysis of seed coat development in Arabidopsis. *Trends Plant Sci* 10, 472-477.
- Ingram, G.C. (2010). Family life at close quarters: communication and constraint in angiosperm seed development. *Protoplasma* 247, 195-214.
- Kasahara, R.D., Notaguchi, M., Nagahara, S., Suzuki, T., Susaki, D., Honma, Y., Maruyama, D., and Higashiyama, T. (2016). Pollen tube contents initiate ovule enlargement and enhance seed coat development without fertilization. *Sci Adv* 2, e1600554.
- Kohler, C., Hennig, L., Bouveret, R., Gheyselinck, J., Grossniklaus, U., and Gruissem, W. (2003). Arabidopsis MSI1 is a component of the MEA/FIE Polycomb group complex and required for seed development. *Embo J* 22, 4804-4814.
- Mizzotti, C., Mendes, M.A., Caporali, E., Schnittger, A., Kater, M.M., Battaglia, R., and Colombo, L. (2012). The MADS box genes SEEDSTICK and ARABIDOPSIS BSISTER play a maternal role in fertilization and seed development. *Plant J* 70, 409-420.
- Mizzotti, C., Ezquer, I., Paolo, D., Rueda-Romero, P., Guerra, R.F., Battaglia, R., Rogachev, I., Aharoni, A., Kater, M.M., Caporali, E., and Colombo, L. (2014). SEEDSTICK is a master regulator of development and metabolism in the Arabidopsis seed coat. *PLoS Genet* 10, e1004856.
- Nesi, N., Debeaujon, I., Jond, C., Stewart, A.J., Jenkins, G.I., Caboche, M., and Lepiniec, L. (2002). The TRANSPARENT TESTA16 locus encodes the ARABIDOPSIS BSISTER MADS domain protein and is required for proper development and pigmentation of the seed coat. *Plant Cell* 14, 2463-2479.
- Pound, M.P., French, A.P., Wells, D.M., Bennett, M.J., and Pridmore, T.P. (2012). CellSeT: novel software to extract and analyze structured networks of plant cells from confocal images. *Plant Cell* 24, 1353-1361.

- Ron, M., Alandete Saez, M., Eshed Williams, L., Fletcher, J.C., and McCormick, S. (2010). Proper regulation of a sperm-specific cis-nat-siRNA is essential for double fertilization in *Arabidopsis*. *Genes Dev* 24, 1010-1021.
- Roszak, P., and Kohler, C. (2011). Polycomb group proteins are required to couple seed coat initiation to fertilization. *Proc Natl Acad Sci U S A* 108, 20826-20831.
- Schneider, C.A., Rasband, W.S., and Eliceiri, K.W. (2012). NIH Image to ImageJ: 25 years of image analysis. *Nat Methods* 9, 671-675.
- Schneitz, K., Hulskamp, M., and Pruitt, R.E. (1995). Wild-type ovule development in *Arabidopsis thaliana*: a light microscope study of cleared whole-mount tissue. *The Plant Journal* 7, 731-749.
- Tsuwamoto, R., Fukuoka, H., and Takahata, Y. (2008). GASSHO1 and GASSHO2 encoding a putative leucine-rich repeat transmembrane-type receptor kinase are essential for the normal development of the epidermal surface in *Arabidopsis* embryos. *Plant J* 54, 30-42.
- Ungu, A., Nowack, M.K., Reymond, M., Shirzadi, R., Kumar, M., Biewers, S., Grini, P.E., and Schnittger, A. (2008). Natural variation in the degree of autonomous endosperm formation reveals independence and constraints of embryo growth during seed development in *Arabidopsis thaliana*. *Genetics* 179, 829-841.
- Xu, W., Fiume, E., Coen, O., Pechoux, C., Lepiniec, L., and Magnani, E. (2016). Endosperm and Nucellus Develop Antagonistically in *Arabidopsis* Seeds. *Plant Cell* 28, 1343-1360.



## Figures

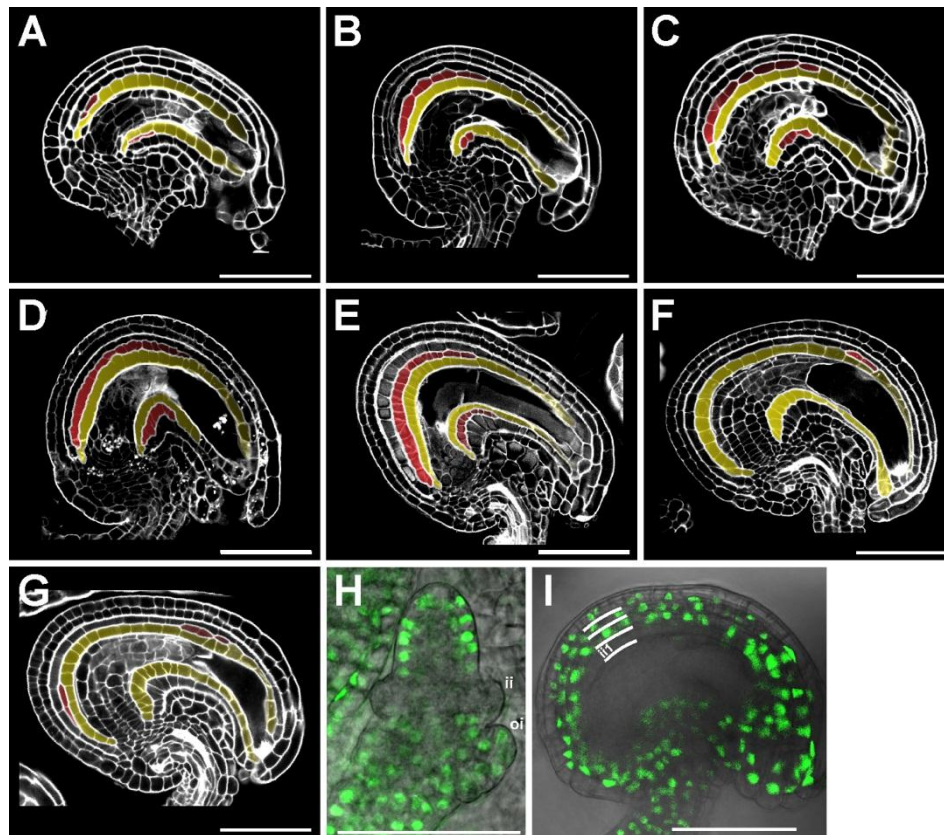

**Figure 1. TT16 and STK promote *ii1* periclinal cell divisions**

(A-C) Central longitudinal sections of wild type ovules progressing (from A to C) through stage 3-VI imaged using the mPS-PI technique. Ecotype Col.

(D-G) Central longitudinal sections of wild type (D), *stk* (E), and *stk;tt16* (F and G) ovules at stage 4-I imaged using the mPS-PI technique. Ecotype Col.

(H-I) GFP fluorescence images superimposed on bright field images of *ProSTK:gSTK-GFP* ovules at stage 2-III (H) and 3-V (I). Integument cell layers are marked by white lines.

Scale bars, 50 μm. *ii1* and *ii1'* are highlighted in yellow and red, respectively.

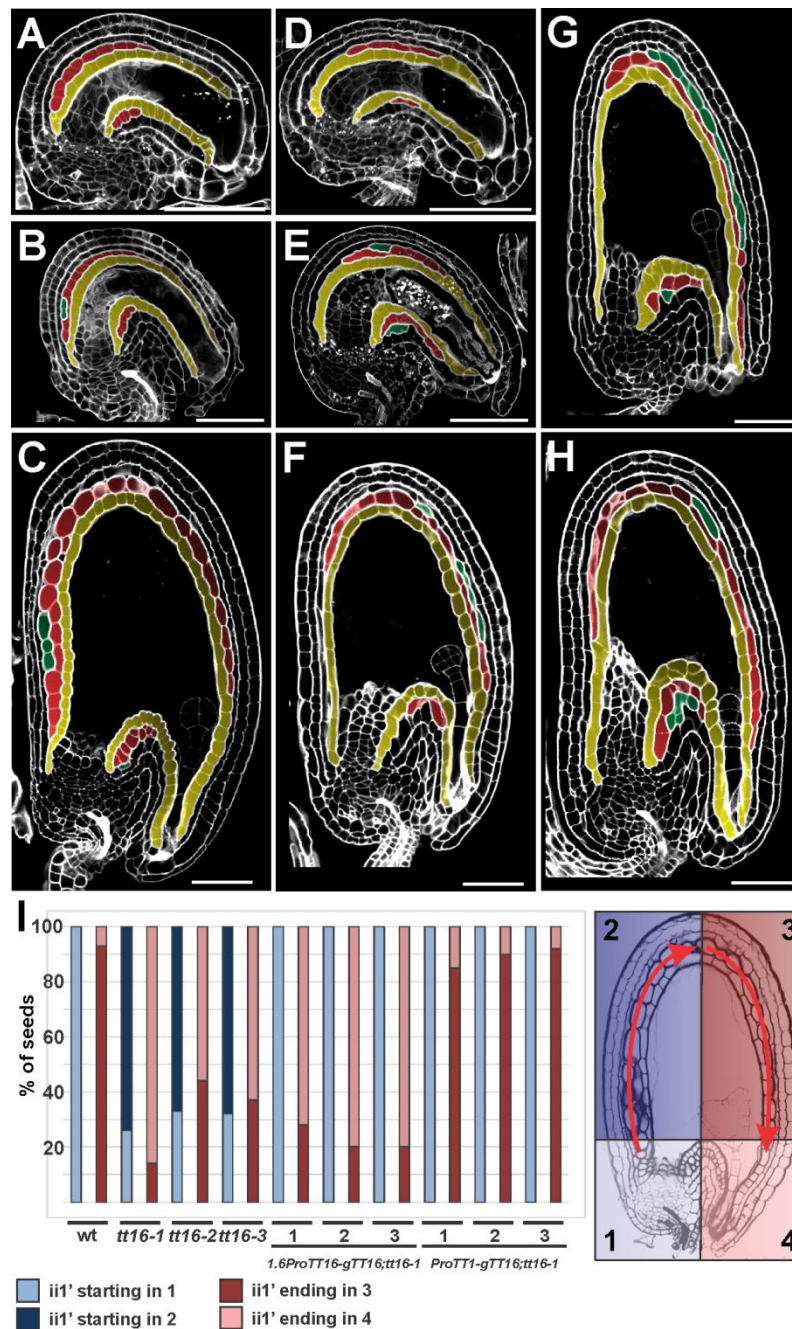

**Figure 2. TT16 regulates ii1' proximal-distal developmental patterning**

(A-C) Central longitudinal sections of wild type ovule at stage 3-VI (A) and seeds at 2 (B) and 4 (C) DAF imaged using the mPS-PI technique. Ecotype Ws.

(D-H) Central longitudinal sections of *tt16* ovule at stage 3-VI (D) and seeds at 2 (E) and 4 (F-H) DAF imaged using the mPS-PI technique. Ecotype Ws.

**(I)** In blue, percentage of seeds (6 DAF) with the ii1' beginning in zone 1 (light blue) or zone 2 (dark blue). In red, percentage of seeds with the ii1' ending in zone 3 (dark red) or zone 4 (light red). Seed zones 1-4 are schematized and color coded on the right of the graph. Ecotype Ws. n=30

Scale bars, 50  $\mu$ m. ii1, ii1', and ii1'' are highlighted in yellow, red, and green, respectively.



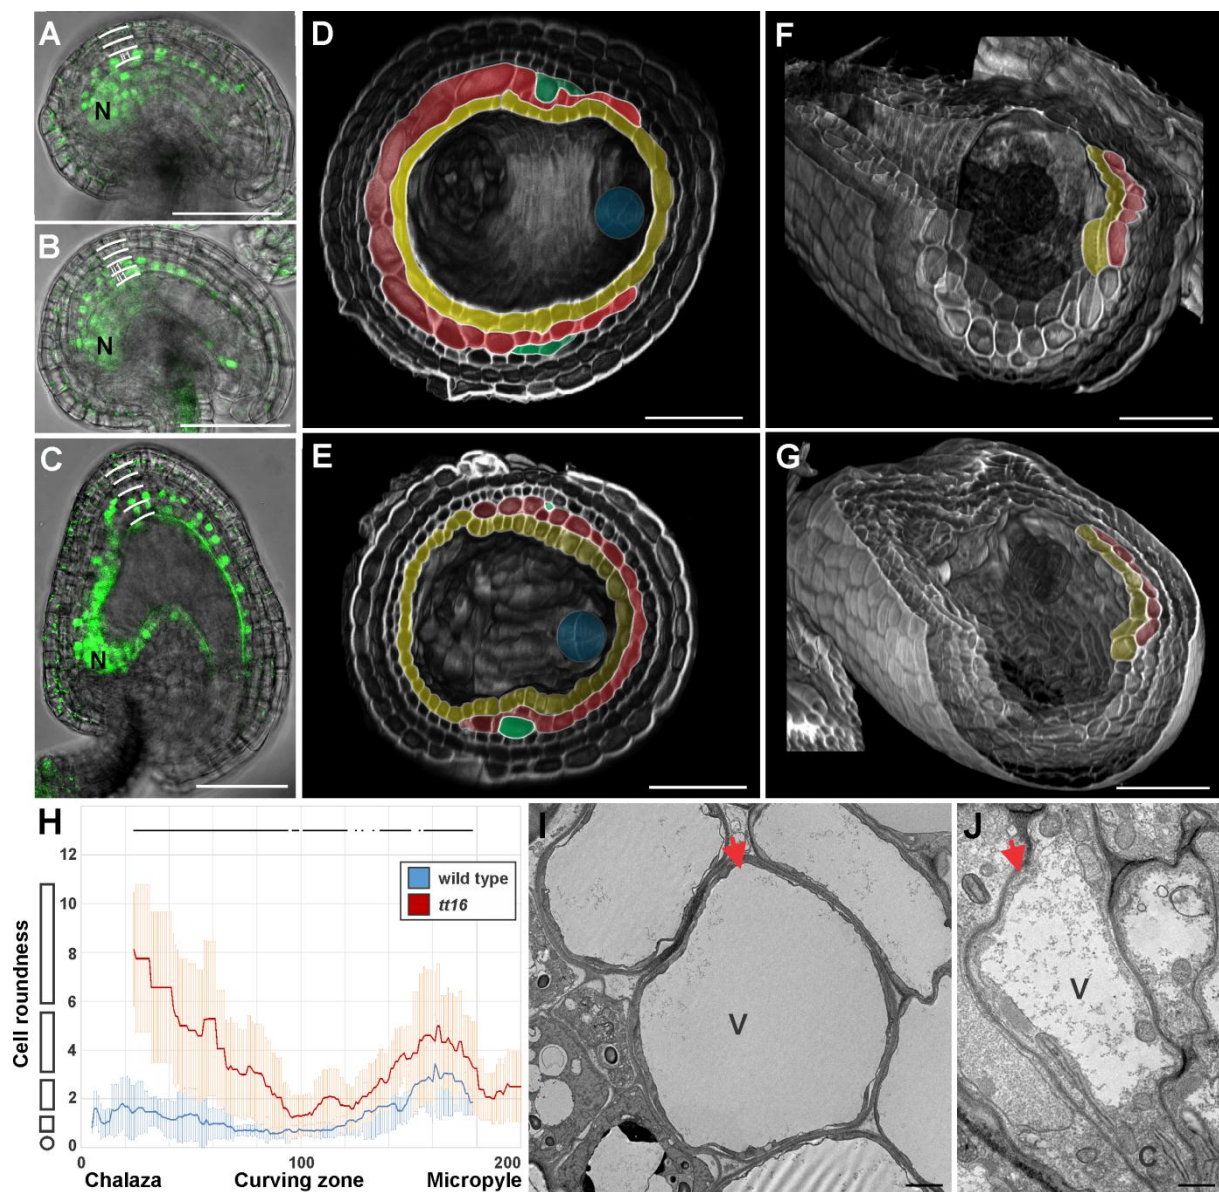

**Figure 3. TT16 regulates ii1' cell orientation and differentiation**

(A-C) GFP fluorescence images superimposed on bright field images of *3.4ProTT16:gTT16-GFP* ovules, at stage 3-V (A) and 3-VI (B), and seed at 2 DAF (C). Integument cell layers are marked by white lines. N, nucellus.

(D and E) Three-dimensional transverse sections of wild type (D) and *tt16* (E) seeds at 4 DAF imaged using the mPS-PI technique. Embryos are highlighted in blue. Ecotype Ws.

**(F and G)** Three-dimensional transverse and longitudinal sections of wild type (F) and *tt16* (G) seeds at 4 DAF imaged using the mPS-PI technique. Ecotype Ws.

**(H)** Average ii1' cell roundness (see Materials and methods) along the seed coat proximal-distal axis (arbitrarily divided in 201 points) as observed in central longitudinal sections of *tt16* (red) and wild type (blue) seeds at 4 DAF. The shapes on the left of the graph exemplify how cell shape changes along the Y axis. Lines on top of the graph indicate statistical difference between wild type and *tt16* (Two-tailed student's *t* test,  $P < 0.05$ ). Error bars: standard deviations.  $n=12$ . Ecotype Ws.

**(I-J)** Transmission electron microscopy images of the curving zone of wild type (I) and *tt16* (J) seed (4 DAF) longitudinal sections. Red arrows indicate ii1' cells. V, vacuole. C, cytoplasm. Ecotype Ws.

Scale bars, 50  $\mu\text{m}$  (A-G) and 10  $\mu\text{m}$  (I and J). Endothelium, ii1', and ii1'' are highlighted in yellow, red, and green, respectively.

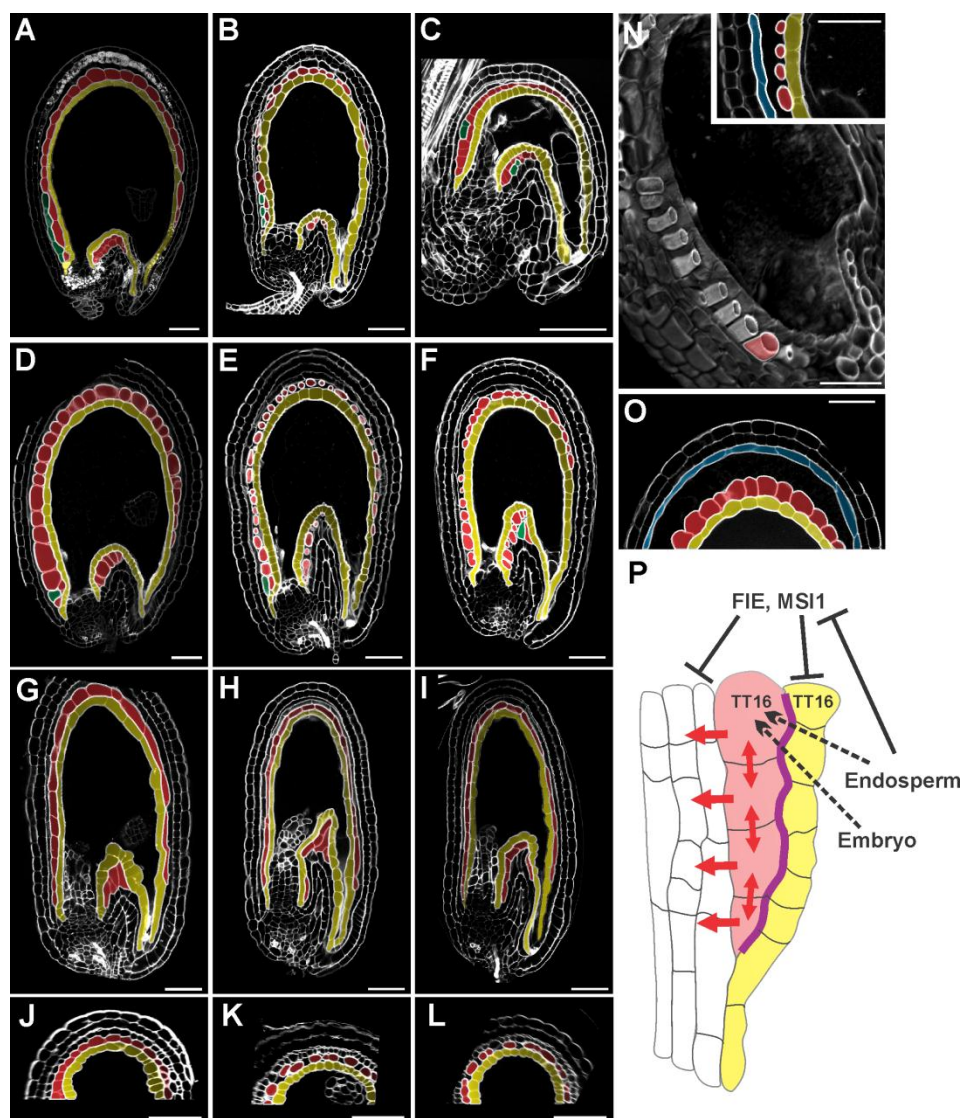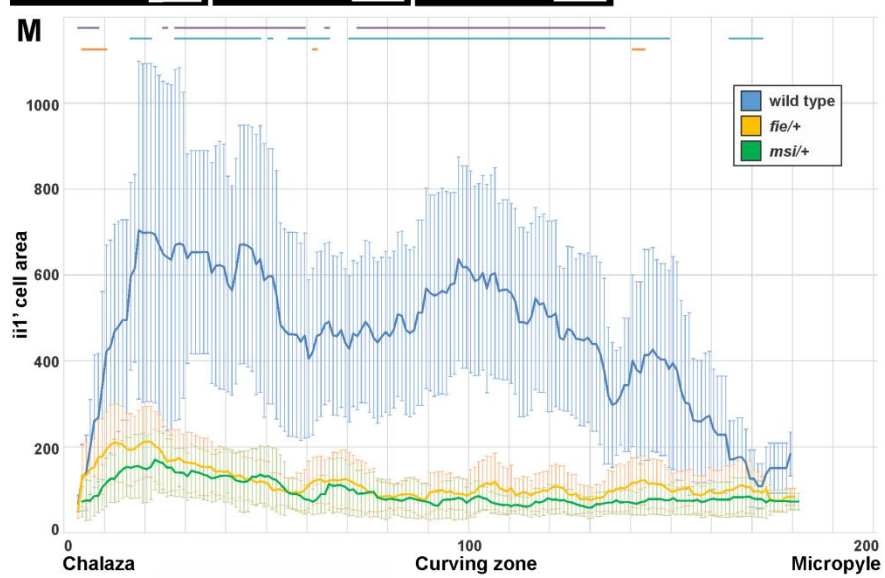

#### Figure 4. ii1' unique response to fertilization

**(A-C)** Central longitudinal sections of wild type (A), *kpl* only-endosperm (B), and *kpl* only-embryo (C) seeds at 6 DAF imaged using the mPS-PI technique. Ecotype Ws.

**(D-F)** Central longitudinal sections of wild type (D), *fie/+* enlarged autonomous (E), and *msil/+* enlarged autonomous (F) seeds at 6 DAF imaged using the mPS-PI technique. Ecotype Col.

**(G-I)** Central longitudinal sections of *tt16* (G), *tt16;fie/+* enlarged autonomous (H), and *tt16;msil/+* enlarged autonomous (I) seeds at 6 DAF imaged using the mPS-PI technique. Ecotype Col.

**(J-L)** Transverse sections of *tt16* (J), *tt16;fie/+* enlarged autonomous (K), and *tt16;msil/+* enlarged autonomous (L) seeds at 6 DAF imaged using the mPS-PI technique. Ecotype Col.

**(M)** Average ii1' cell area (see Materials and methods) along the seed coat proximal-distal axis (arbitrarily divided in 201 points) as observed in central longitudinal sections of wild type seeds (blue), and *fie/+* (orange) and *msil/+* (green) enlarged autonomous seeds at 6 DAF. Lines on top of the graph indicate statistical difference between wild type and *fie/+* (purple), wild type and *msil/+* (blue), and *fie/+* and *msil/+* (orange) (Two-tailed student's *t* test,  $P < 0.05$ ). Error bars: standard deviations.  $n > 12$ . Ecotype Col.

**(N)** Three-dimensional longitudinal section of a *fie/+* enlarged autonomous seed at 6 DAF imaged using the mPS-PI technique. Only one ii1' cell is highlighted in red. The inset shows the central longitudinal section of the chalazal side of the same seed imaged using the mPS-PI technique. Ecotype Col.

**(O)** Central longitudinal section of the curving zone of a wild type seed at 6 DAF, gently squeezed between slide and coverslip, imaged using the mPS-PI technique. Ecotype Col.

**(P)** Model for the development of the seed ii1'. Black and red arrows indicate functional relationships and mechanical forces, respectively. The purple line indicate strong cell-cell adhesion.

Scale bars, 50  $\mu\text{m}$ . Endothelium, ii1', ii1'', and ii2 are highlighted in yellow, red, green, and light blue, respectively.



## SUPPLEMENTARY INFORMATION

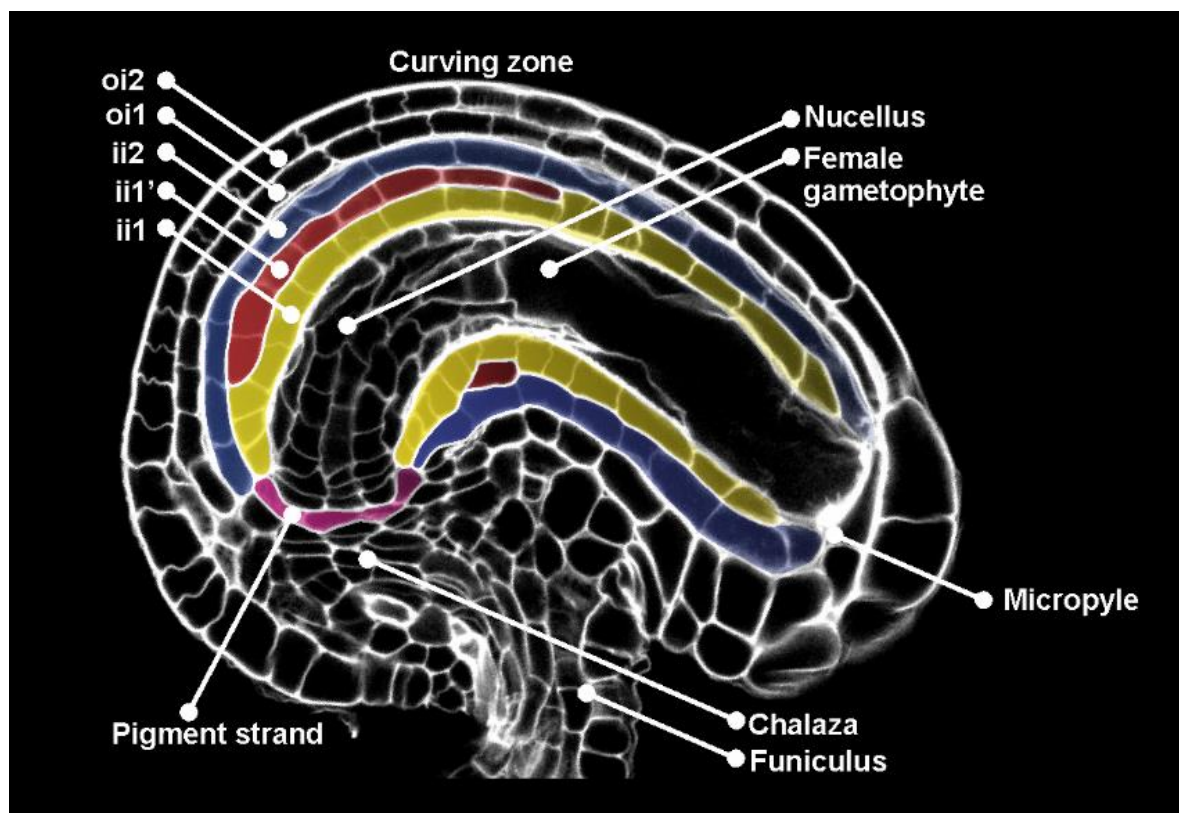

### Figure S1. Ovule tissues and functional domains

Central longitudinal section of a wild type ovule at stage 3-VI imaged using the mPS-PI technique. Ecotype Col.

ii1, ii1', ii2, and pigment strand are highlighted in yellow, red, blue and purple, respectively.

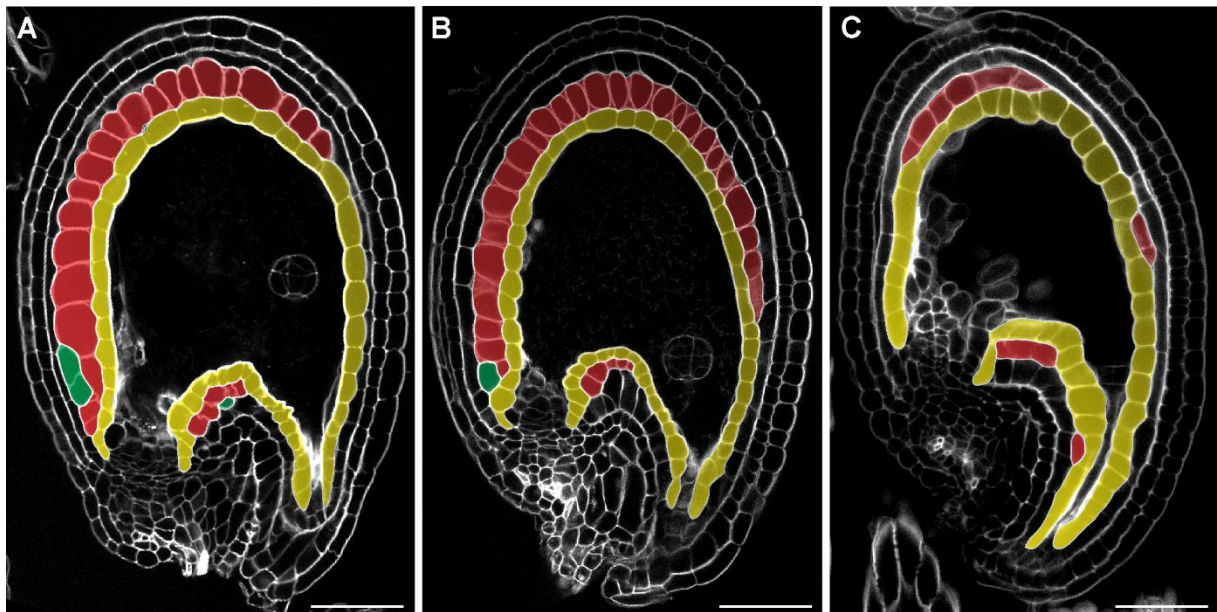

**Figure S2. ii1' cellular patterning in *tt16;stk* seeds**

(A-C) Central longitudinal sections of wild type (A), *stk* (B), and *tt16;stk* (C) seeds at 4 DAF imaged using the mPS-PI technique. Ecotype Col. Endothelium, ii1' and ii1'' are highlighted in yellow, red, and green, respectively. Scale bar, 50 μm.

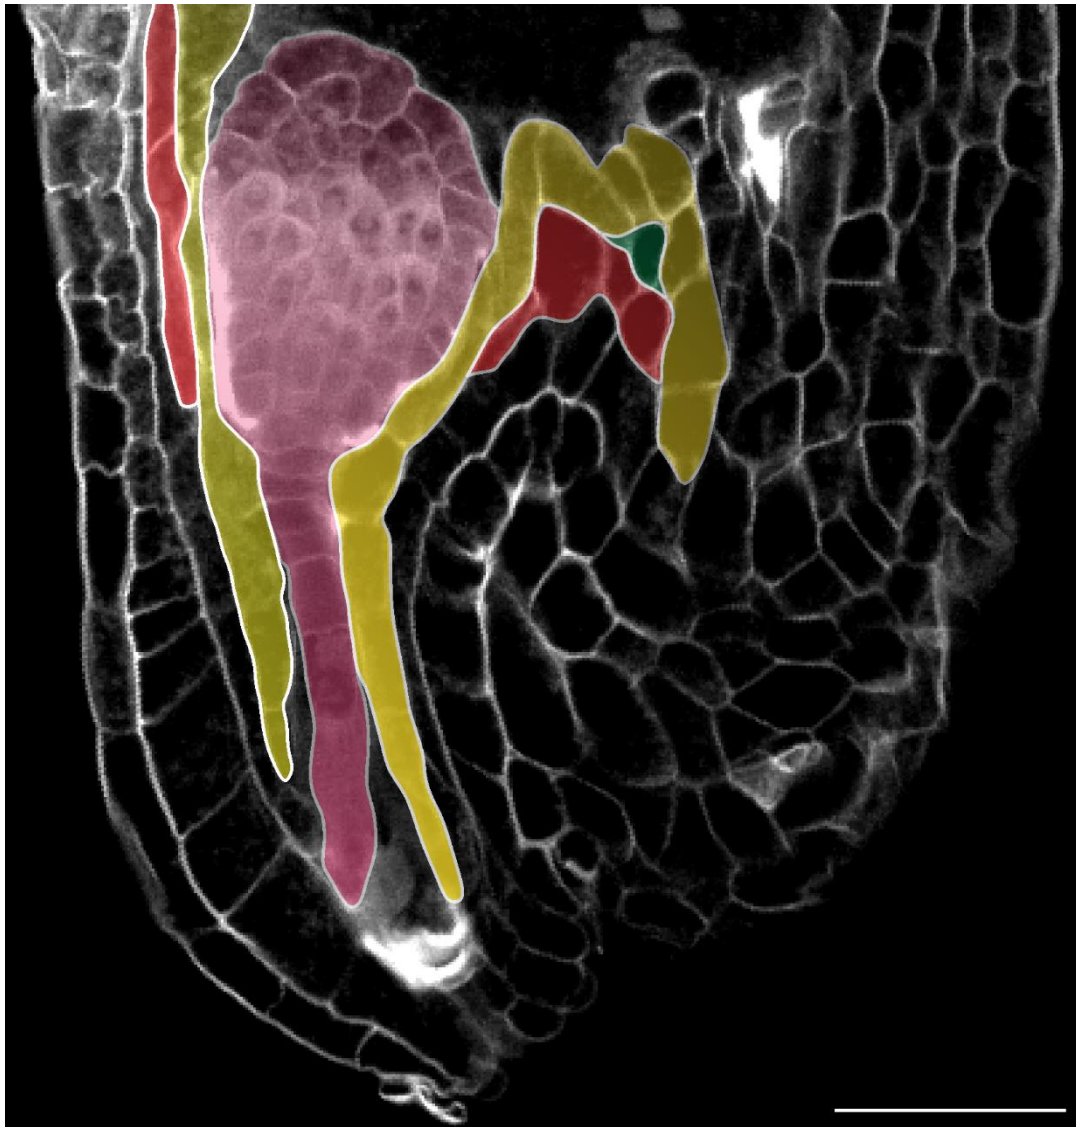

**Figure S3. *tt16*/+ embryo compressed by *tt16*/- maternal tissues**

Central longitudinal section of the micropylar region of a seed at 6 DAF (imaged using the mPS-PI technique) developed from a *tt16* ovule fertilized with wild type pollen. Ecotype Ws. Scale bar, 50  $\mu$ m. Endothelium, ii1', ii1'', and embryo are highlighted in yellow, red, green, and pink respectively.

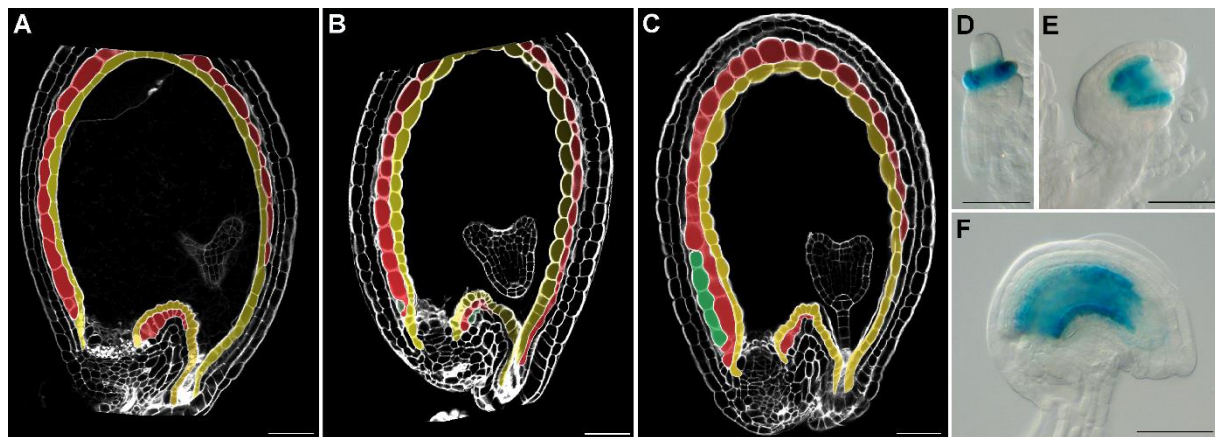

#### Figure S4. *tt16* complementation lines

(A-C) Central longitudinal sections of wild type (A), *1.6ProTT16:gTT16;tt16* (B), and *ProTT1:gTT16;tt16* (C) seeds at 6 DAF imaged using the mPS-PI technique. Ecotype Ws. Endothelium, *ii1'* and *ii1''* are highlighted in yellow, red, and green, respectively.

(D-F) GUS activity in cleared whole mounts of *ProTT1:gTT16-GUS* ovules at stage 2-III (D), stage 2-V (E), and stage 3-VI (F). Ecotype Col.

Scale bar, 50 μm.

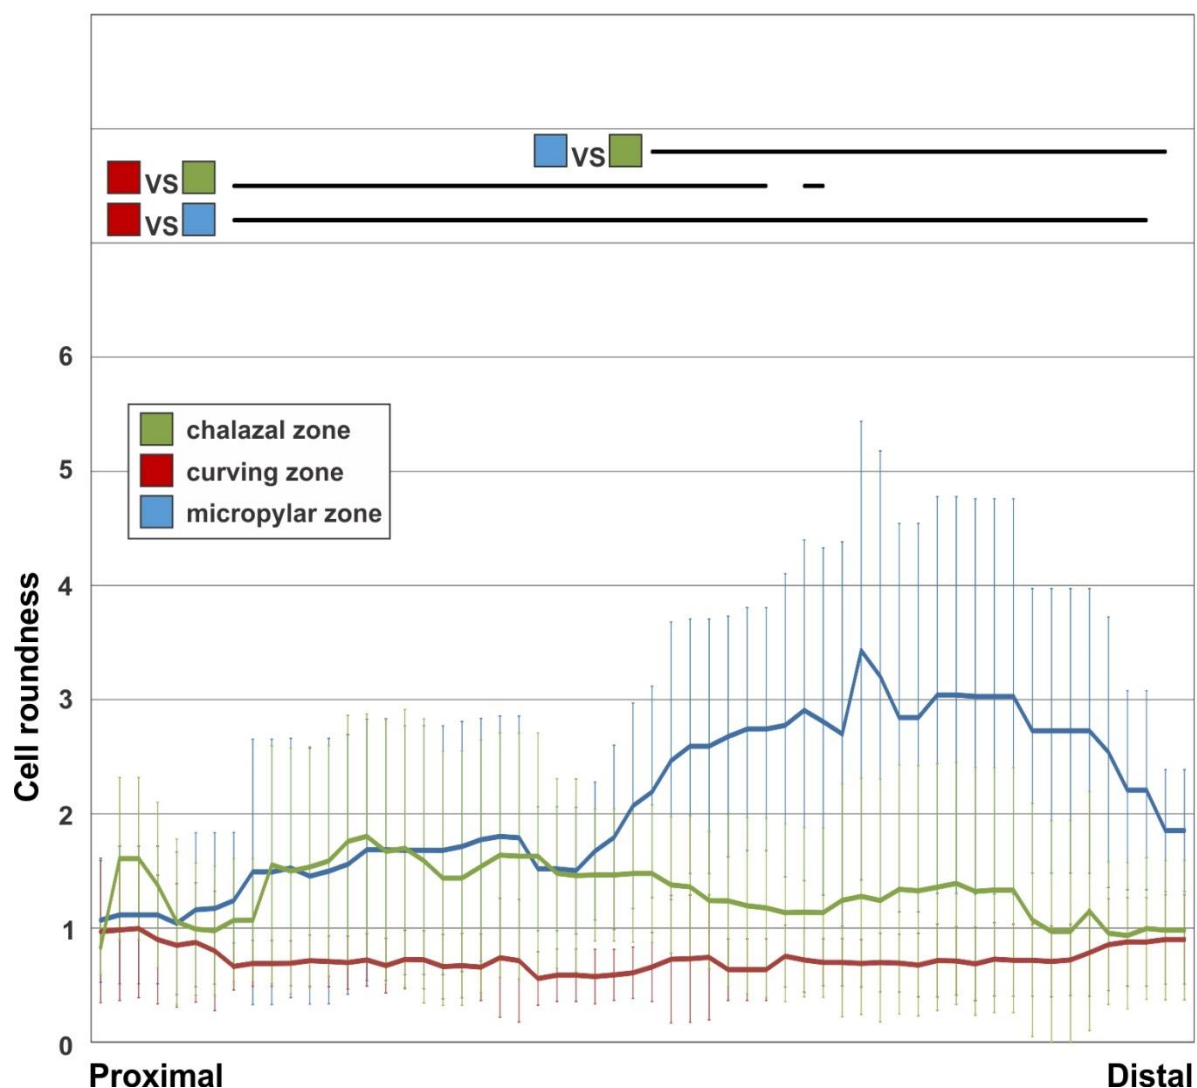

**Figure S5. ii1' cell roundness along the proximal-distal axis**

Average ii1' cell roundness (see Materials and methods) in the chalazal zone (green), curving zone (red) and micropylar zone (light blue) as observed in central longitudinal sections of wild type seeds at 4 DAF. Lines on top of the graph indicate regions of statistically significant difference between zones (Two tailed student's *t* test ,  $P < 0.05$ ).  $n=12$ . Error bars: standard deviations. Ecotype Ws.



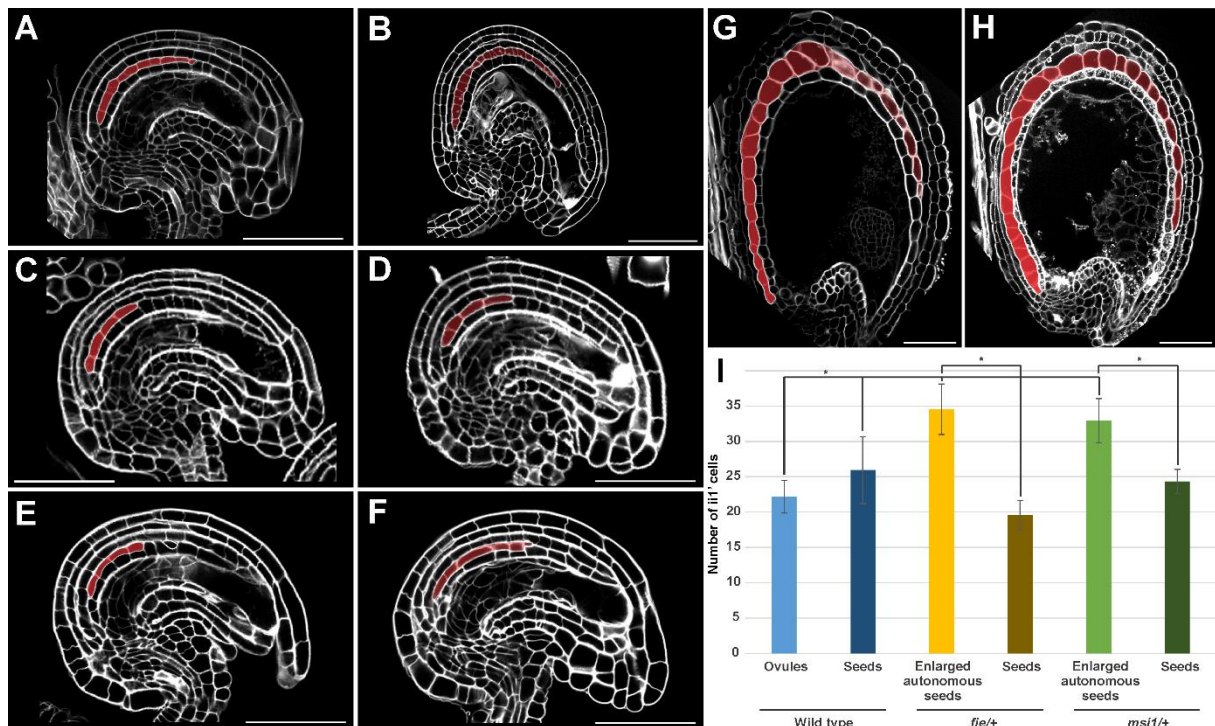

**Figure S6. Ovule development in *kpl1* and *fis* mutants**

(A) Central longitudinal section of a *kpl1* ovule at stage 3-VI imaged using the mPS-PI technique. Ecotype Ws.

(B) Central longitudinal section of a wild type unfertilized ovule 6DAF imaged using the mPS-PI technique. Ecotype Ws.

(C-E) Central longitudinal sections of *fie/+* (C), *msil/+* (D), *tt16;fie/+* (E), and *tt16;msil/+* (F) ovules at stage 3-VI imaged using the mPS-PI technique. Ecotype Col.

(G-H) Central longitudinal sections of *fie/+* (G) and *msil/+* (H) seeds at 6 DAF imaged using the mPS-PI technique. Ecotype Col.

(I) Average number of *ii1'* cells as observed in central longitudinal sections of wild type (blue), *fie/+* (yellow) and *msil/+* (green) ovules (from emasculated flowers) and seeds at 6 DAF. Asterisks indicate statistical difference (Two-tailed student's *t* test, *P* < 0.05). Error bars: standard deviations. *n* > 9. Ecotype Col.

Scale bars, 50  $\mu$ m. The *ii1'* is highlighted in red.
